# Supplementary material
Source: MDPI journal article supplement (https://www.mdpi.com/2076-3417/11/13/5765)
Supplement: s1 [file s1]

# Probiotic Potential of a Novel Vitamin B2-Overproducing *Lactobacillus plantarum* Strain, HY7715, Isolated from Kim-chi

Joo Yun Kim, Eun Jung Choi, Jae Ho Lee, Myeong-Seok Yoo, Keon Heo \*, Jae-Jung Shim and Jung-Lyoul Lee

## Supplementary Materials

**Table S1.** Confirmation of riboflavin production in CMD of LAB isolated from kimchi.

| No. | Species identification<br>(16S rDNA) | CDM growth |     | Riboflavin (mg/L) | Roseoflavin resistance<br>(150µg/mL) |
|-----|--------------------------------------|------------|-----|-------------------|--------------------------------------|
|     |                                      | 1st        | 2nd |                   |                                      |
| 1   | <i>L. plantarum</i>                  | +          | +   | -                 | -                                    |
| 2   | <i>L. plantarum</i>                  | +          | ++  | 0.847 ± 0.065     | +                                    |
| 3   | <i>L. plantarum</i>                  | +          | ++  | 0.503 ± 0.078     | +                                    |
| 4   | <i>L. plantarum</i>                  | +          | -   | -                 | -                                    |
| 5   | <i>L. plantarum</i>                  | +          | +   | -                 | -                                    |
| 6   | <i>L. farciminis</i>                 | +          | +   | -                 | -                                    |
| 7   | <i>L. plantarum</i>                  | +          | -   | -                 | -                                    |
| 8   | <i>L. plantarum</i>                  | +          | +   | -                 | -                                    |
| 9   | <i>L. plantarum</i>                  | +          | ++  | 0.939 ± 0.095     | +                                    |
| 10  | <i>L. fermentum</i>                  | +          | ++  | 0.098 ± 0.056     | -                                    |
| 11  | <i>L. plantarum</i>                  | +          | +   | -                 | -                                    |
| 12  | <i>L. plantarum</i>                  | +          | +   | -                 | -                                    |
| 13  | <i>L. plantarum</i>                  | +          | -   | -                 | -                                    |
| 14  | <i>L. plantarum</i>                  | +          | ++  | 0.475 ± 0.107     | +                                    |
| 15  | <i>L. plantarum</i>                  | +          | -   | -                 | -                                    |
| 16  | <i>L. plantarum</i>                  | +          | -   | -                 | -                                    |
| 17  | <i>L. plantarum</i>                  | +          | -   | -                 | -                                    |
| 18  | <i>L. plantarum</i>                  | +          | -   | -                 | -                                    |
| 19  | <i>L. plantarum</i>                  | +          | +   | 0.035 ± 0.138     | -                                    |
| 20  | <i>L. plantarum</i>                  | +          | ++  | 0.046 ± 0.016     | -                                    |
| 21  | <i>L. fermentum</i>                  | +          | ++  | 0.492 ± 0.060     | +                                    |
| 22  | <i>L. plantarum</i>                  | +          | ++  | 0.161 ± 0.071     | -                                    |
| 23  | <i>L. fermentum</i>                  | +          | -   | -                 | -                                    |
| 24  | <i>L. plantarum</i>                  | +          | -   | -                 | -                                    |
| 25  | <i>L. plantarum</i>                  | +          | +   | 0.121 ± 0.184     | -                                    |
| 26  | <i>L. plantarum</i>                  | +          | +   | 0.086 ± 0.012     | -                                    |
| 27  | <i>L. plantarum</i>                  | +          | ++  | 0.119 ± 0.079     | -                                    |
| 28  | <i>L. plantarum</i>                  | +          | ++  | 0.091 ± 0.066     | -                                    |
| 29  | <i>L. plantarum</i>                  | +          | -   | -                 | -                                    |
| 30  | <i>L. plantarum</i>                  | +          | +   | 0.139 ± 0.106     | -                                    |

|    |                          |   |    |               |   |
|----|--------------------------|---|----|---------------|---|
| 31 | <i>L. plantarum</i>      | + | -  | -             | - |
| 32 | <i>L. plantarum</i>      | + | +  | -             | - |
| 33 | <i>L. plantarum</i>      | + | -  | -             | - |
| 34 | <i>L. plantarum</i>      | + | +  | -             | - |
| 35 | <i>L. plantarum</i>      | + | ++ | 0.118 ± 0.091 | - |
| 36 | <i>L. plantarum</i>      | + | +  | 0.128 ± 0.049 | - |
| 37 | <i>L. paracasei</i>      | + | -  | -             | - |
| 38 | <i>L. paracasei</i>      | + | -  | -             | - |
| 39 | <i>Lc. lactis subsp.</i> | + | -  | -             | - |
| 40 | <i>Lc. lactis subsp.</i> | + | +  | -             | - |
| 41 | <i>Lc. lactis subsp.</i> | + | -  | -             | - |
| 42 | <i>Lc. lactis subsp.</i> | + | ++ | 0.096± 0.016  | - |
| 43 | <i>Lc. lactis subsp.</i> | + | -  | -             | - |
| 44 | <i>Lc. lactis subsp.</i> | + | +  | -             | - |
| 45 | <i>Lc. lactis subsp.</i> | + | +  | 0.109± 0.184  | - |
| 46 | <i>L. plantarum</i>      | + | -  | -             | - |

Data were shown as mean ± standard error.

**Table S2.** Composition of AIN-93G and AIN-93G\_RD diet.

| AIN-93G                    |                    | AIN-93G_RD                                      |                    |
|----------------------------|--------------------|-------------------------------------------------|--------------------|
| Diet ingredient            | Composition (g/kg) | Diet ingredient                                 | Composition (g/kg) |
| Casein                     | 200.0              | Casein                                          | 200.0              |
| L-Cystine                  | 3.0                | L-Cystine                                       | 3.0                |
| Corn Starch                | 397.48             | Corn Starch                                     | 397.48             |
| Maltodextrin               | 132.0              | Maltodextrin                                    | 132.0              |
| Sucrose                    | 100                | Sucrose                                         | 100                |
| Soybean Oil                | 70.0               | Soybean Oil                                     | 70.0               |
| Cellulose                  | 50.0               | Cellulose                                       | 50.0               |
| Mineral Mix,<br>AIN-93G-MX | 35.0               | Mineral Mix,<br>AIN-93G-MX                      | 35.0               |
| Vitamin Mix,<br>AIN-93-VX  | 10.0               | Vitamin Mix,<br>AIN-93-VX without<br>riboflavin | 10.0               |
| Choline Bitartrate         | 2.5                | Choline Bitartrate                              | 2.5                |
| TBHQ, antioxidant          | 0.014              | TBHQ, antioxidant                               | 0.014              |

Vitamin Mix, AIN-93-VX contains 0.6 g/kg of riboflavin. For the production of AIN-93G\_RD feed, a vitamin mix lacking only riboflavin was made to order, and the same amount of dextrin as riboflavin was added in riboflavin-free AIN-93-VX.

**Table S3.** Antibiotic resistance and minimum inhibitory concentrations (MIC).

| Antibiotics     | Cut-off Values* (mg/L) | MIC (mg/L) | Interpretation |
|-----------------|------------------------|------------|----------------|
| Ampicillin      | 2                      | 0.25       | S              |
| Vancomycin      | n.r                    | 256        | n.r            |
| Gentamycin      | 16                     | 2          | S              |
| Kanamycin       | 64                     | 64         | S              |
| Streptomycin    | n.r                    | 192        | n.r            |
| Erythromycin    | 1                      | 0.5        | S              |
| Clindamycin     | 2                      | 0.5        | S              |
| Tetracycline    | 32                     | 3          | S              |
| Chloramphenicol | 8                      | 8          | S              |

\* Cut-off values published by the European Committee on Antimicrobial Susceptibility Testing (EUCAST, <http://www.eucast.org/>), EFSA; n.r, not required; s, sensitive.

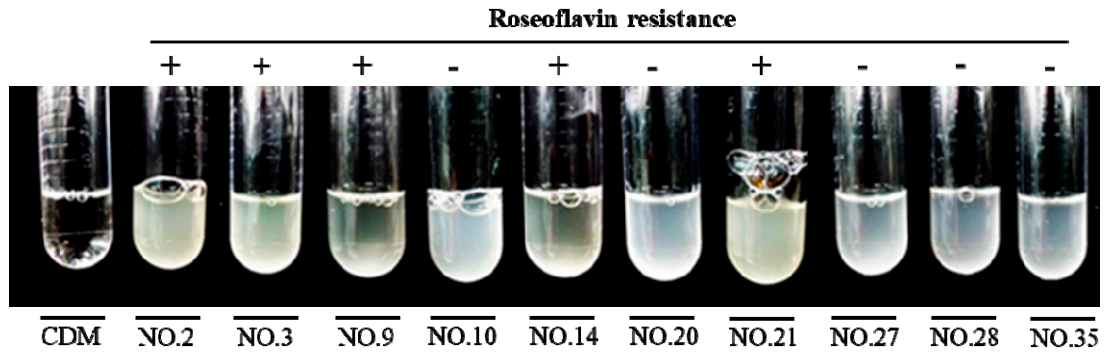

**Figure S1.** Example of qualitative detection of riboflavin produced by change of color from white to yellow in riboflavin-free chemically defended media (CDM). .

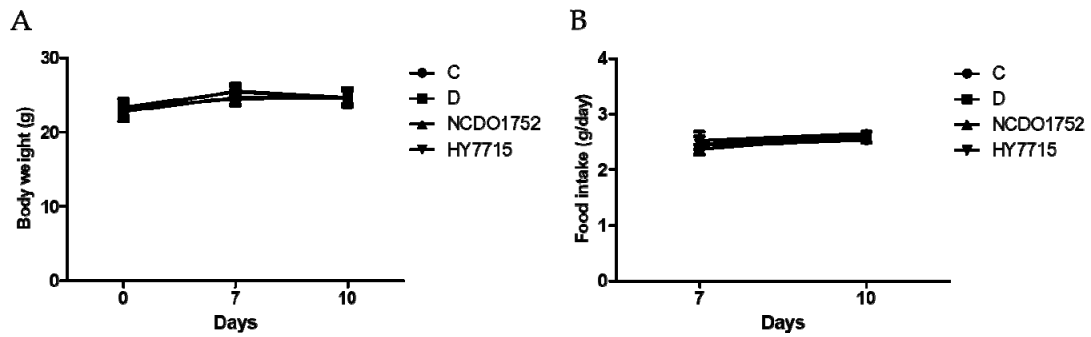

**Figure S2.** Changes in (A) body weight and (B) food intake in the experimental groups. The results are expressed as mean  $\pm$  standard error of means (SEM).

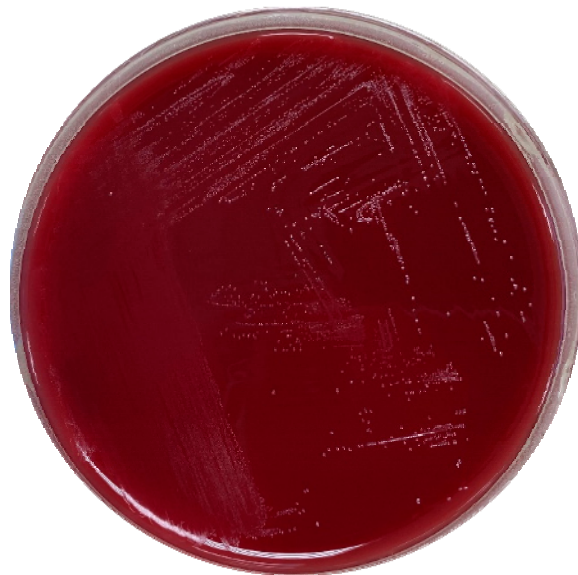

**Figure S3.** Confirmation of  $\beta$ -hemolytic reaction of HY7715 in blood agar plate. No  $\beta$ -hemolytic reaction.
